# Supplementary material for: Design and combination of magnetic ionic liquids and hydrophobic deep eutectic solvents for safer extraction of titanium: physicochemical properties and toxicity studies
Source: Royal Society of Chemistry journal article supplement (doi:10.1039/d2gc01874h), 2022-01-01
Supplement: d2gc01874h1.pdf [file d2gc01874h1.pdf]

## Electronic Supplementary Information (ESI)

Design and combine magnetic ionic liquids and hydrophobic  
deep eutectic solvents for safer extraction of titanium:  
physicochemical properties and toxicity studies

Keyu Zhu<sup>a,b</sup>, Qifeng Wei<sup>a,b</sup>, Kang Liu<sup>d</sup>, Huaquan Li<sup>c,\*</sup>, Xiulian Ren<sup>a,b,\*</sup>

<sup>a</sup>School of Chemistry and Chemical Engineering, Harbin Institute of Technology,  
Harbin 150000, P.R. China. E-mail: renxiulian@126.com

<sup>b</sup>School of Marine Science and Technology, Harbin Institute of Technology at WeiHai,  
WeiHai 264200, P.R. China.

<sup>c</sup>College of Materials Science and Engineering, Chongqing University, Chongqing  
400044, P.R. China. E-mail: lihuaquan1229@163.com

<sup>d</sup>School of Materials Science and Engineering, Harbin Institute of Technology at  
Weihai, WeiHai 264200, P.R. China.

---

\* Corresponding Author

Table S1. The cumulative extraction efficiency (%) of metal ions in each stage after the five-stage countercurrent extraction reached equilibrium<sup>a</sup>.

| Stage | Al | Ca    | Mn   | V     | Mg    | Cr    | Ti    |
|-------|----|-------|------|-------|-------|-------|-------|
| 1     | 0  | 0     | 0    | 0     | 0     | 4.27  | 54.74 |
| 2     | 0  | 0     | 0    | 0     | 0     | 13.56 | 82.57 |
| 3     | 0  | 0     | 0    | 0     | 0     | 20.01 | 92.59 |
| 4     | 0  | 0     | 0    | 0     | 0     | 25.00 | 97.35 |
| 5     | 0  | 24.74 | 1.23 | 11.90 | 14.33 | 35.71 | 99.23 |

<sup>a</sup>O/A=1, time = 5 min, temperature = 40 °C.

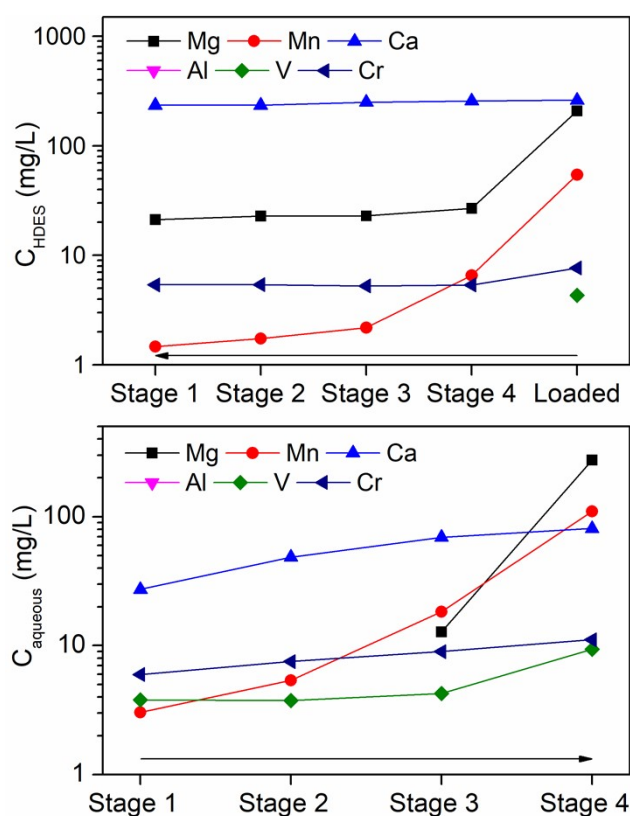

Figure S1. The distribution of metal ions in the HDES-4 and the aqueous phase of each stage after the four-stage countercurrent scrubbing was balanced. The concentration of unmarked points is 0. The 10 mol/L HCl was selected as the scrubbing agent in order to reduce the loss of titanium during the scrubbing process. O/A=2, time = 5 min,

temperature = 40 °C.

Table S2. The purity (%) of titanium in each stage of the stripping solution after the three-stage countercurrent stripping was balanced<sup>a</sup>.

| Stage | Al | Ca   | Mn   | V | Mg | Cr   | Ti    | Fe   |
|-------|----|------|------|---|----|------|-------|------|
| 1     | 0  | 0.72 | 0.06 | 0 | 0  | 0.16 | 98.93 | 0.13 |
| 2     | 0  | 0.14 | 0.02 | 0 | 0  | 0.07 | 99.75 | 0.03 |
| 3     | 0  | 0.08 | 0.01 | 0 | 0  | 0.04 | 99.87 | 0.00 |

<sup>a</sup>O/A=1.5, time = 5 min, temperature = 40 °C.
